# Supplementary material for: Have precipitation extremes and annual totals been increasing in the world's dry regions over the last 60 years?
Source: Copernicus journal article supplement (doi:10.5194/hess-21-441-2017), 2017-01-25
Supplement: Supplementary file [file hess-21-441-2017-supplement-title-page.pdf › hess-21-441-2017-supplement-title-page.pdf]

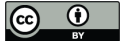

*Supplement of*

**Have precipitation extremes and annual totals been increasing  
in the world's dry regions over the last 60 years?**

**Sebastian Sippel et al.**

*Correspondence to:* Sebastian Sippel (ssippel@bgc-jena.mpg.de)

- hess-21-441-2017-supplement-title-page.pdf
- Supplementary\_Code\_Sippel\_et al\_HESS.R

The copyright of individual parts of the supplement might differ from the CC-BY 3.0 licence.
